# Supplementary material for: The Association between Smoking Cessation and Depressive Symptoms: Diet Quality Plays a Mediating Role
Source: MDPI journal article supplement (doi:10.3390/nu14153047), 2022-07-25
Supplement: s1 [file s1]

**Table S1.** The classifications of covariates

| <b>Covariates</b>                                | <b>Classifications</b>                                                                  |
|--------------------------------------------------|-----------------------------------------------------------------------------------------|
| <b>Gender</b>                                    | Female; Male                                                                            |
| <b>Age (year)</b>                                | Continuous                                                                              |
| <b>Race</b>                                      | Mexican American; Non-Hispanic White; Non-Hispanic Black;<br>Other Hispanic; Other race |
| <b>Annual household income</b>                   | < 20000\$, $\geq$ 20000\$                                                               |
| <b>Educational level</b>                         | Below high school; High school; Above high school;                                      |
| <b>Body mass index</b>                           | Continuous                                                                              |
| <b>Smoked at least 100 cigarettes in life</b>    | No; Yes                                                                                 |
| <b>Had at least 12 alcohol drinks/year</b>       | No; Yes                                                                                 |
| <b>Hypertension</b>                              | No; Yes                                                                                 |
| <b>Diabetes</b>                                  | No; Yes                                                                                 |
| <b>Work physical activity</b>                    | Moderate; Vigorous; Other                                                               |
| <b>Recreational physical activity</b>            | Moderate; Vigorous; Other                                                               |
| <b>Total energy intake (kcal/d) <sup>a</sup></b> | Continuous                                                                              |
| <b>Caffeine intake (mg/d) <sup>a</sup></b>       | Continuous                                                                              |

<sup>a</sup> the mean dietary intake through two 24-h dietary data.

**Table S2.** Association Between Smoking Cessation and Depressive Symptoms in model2, stratified by

# HEI: NHANES 2007–2014 (N=20,004)

| HEI groups      |               |      | <50     |             | 50-70   |             | >=70   |             | P-interaction |
|-----------------|---------------|------|---------|-------------|---------|-------------|--------|-------------|---------------|
|                 |               |      | OR      | 95% CI      | OR      | 95% CI      | OR     | 95% CI      |               |
| Time (years)    | Since         | Quit | 0.974*  | 0.952-0.996 | 0.980*  | 0.960-0.999 | 1.031  | 0.997-1.037 | 0.0471        |
| Smoking status  |               |      |         |             |         |             |        |             |               |
| Current smokers |               |      | 1       | (ref)       | 1       | (ref)       | 1      | (ref)       |               |
| Time (years)    | Since         | Quit |         |             |         |             |        |             |               |
|                 | < 10 years    |      | 0.642*  | 0.455-0.905 | 0.603*  | 0.401-0.909 | 0.778  | 0.243-2.481 |               |
|                 | 10 – 20 years |      | 0.376** | 0.236-0.599 | 0.304** | 0.184-0.504 | 0.768  | 0.199-2.967 |               |
|                 | 20 – 30 years |      | 0.611   | 0.306-1.220 | 0.496*  | 0.274-0.896 | 0.789  | 0.234-2.645 |               |
|                 | >=30 years    |      | 0.384*  | 0.178-0.832 | 0.282** | 0.136-0.584 | 1.547  | 0.435-5.510 |               |
| Never smoked    |               |      | 0.432** | 0.341-0.547 | 0.429** | 0.317-0.580 | 0.417* | 0.195-0.894 |               |

Calculated using binary logistic regression. Model 2 adjusted for age, gender, race/ethnicity, educational level, household income, caffeine intake, total energy intake, alcohol consumption, work activity, recreational activity, diabetes, hypertension and BMI.

\*P < 0.05; \*\*P < 0.01

**Table S3.** Baseline characteristics of participants by completeness of the depression scale, NHANES 2007–2014 (N=23352)

|                                         | Complete depression data | Missing depression data | P value |
|-----------------------------------------|--------------------------|-------------------------|---------|
| Number of participants (%) <sup>a</sup> | 20,004 (85.66)           | 3348 (14.34)            |         |
| Age                                     | 49 (34.64)               | 47 (34.65)              | 0.85    |
| Age (year) <sup>a</sup>                 |                          |                         | <0.001  |
| 18-39                                   | 6714 (35.91)             | 1206 (41.43)            |         |
| 40-59                                   | 6590 (38.36)             | 1082 (36.63)            |         |
| ≥60                                     | 6700 (25.72)             | 1060 (21.94)            |         |
| Gender (%) <sup>a</sup>                 |                          |                         | <0.001  |
| Male                                    | 10007 (49.59)            | 1485 (43.32)            |         |
| Female                                  | 9997 (50.41)             | 1863 (56.68)            |         |
| Race/ethnicity (%) <sup>a</sup>         |                          |                         | <0.001  |
| Mexican American                        | 2967 (8.27)              | 511 (9.82)              |         |
| Other Hispanic                          | 2027 (5.37)              | 344 (6.46)              |         |
| Non-Hispanic White                      | 8949 (68.76)             | 1206 (58.15)            |         |
| Non-Hispanic Black                      | 4206 (11.03)             | 761 (13.92)             |         |
| Other races                             | 1855 (6.58)              | 526 (11.65)             |         |
| Educational level (%) <sup>a</sup>      |                          |                         | < 0.001 |
| < high school                           | 1990 (5.24)              | 564 (10.71)             |         |
| High school                             | 7522 (34.24)             | 1288 (36.80)            |         |
| > high school                           | 10159 (60.52)            | 1455 (52.50)            |         |
| Smoke status (%) <sup>a</sup>           |                          |                         | <0.001  |
| Never smoker                            | 10962 (55.07)            | 1960 (57.68)            |         |
| Former smoker                           | 4786 (24.27)             | 689 (19.78)             |         |
| Current smoker                          | 4255 (20.67)             | 697 (22.54)             |         |
| Healthy Eating Index <sup>b</sup>       | 53.12 (43.97,62.76)      | 52.95 (44.45,62.87)     | 0.5678  |
| Healthy Eating Index (%) <sup>a</sup>   |                          |                         | 0.7991  |
| <50                                     | 7971 (41.77)             | 645 (41.45)             |         |
| 50-70                                   | 9000 (45.88)             | 722 (45.44)             |         |
| ≥70                                     | 2372 (12.35)             | 194 (13.11)             |         |

Data are number of participants (weighted percentage) or medians (interquartile ranges).

PHQ, Patient Health Questionnaire; RDA, Recommended Dietary Allowance.

<sup>a</sup> Chi-square test was used to compare the percentage between participants with and without depression symptoms.

<sup>b</sup> Mann-Whitney U test was used to compare the difference between participants with and without depression symptoms.

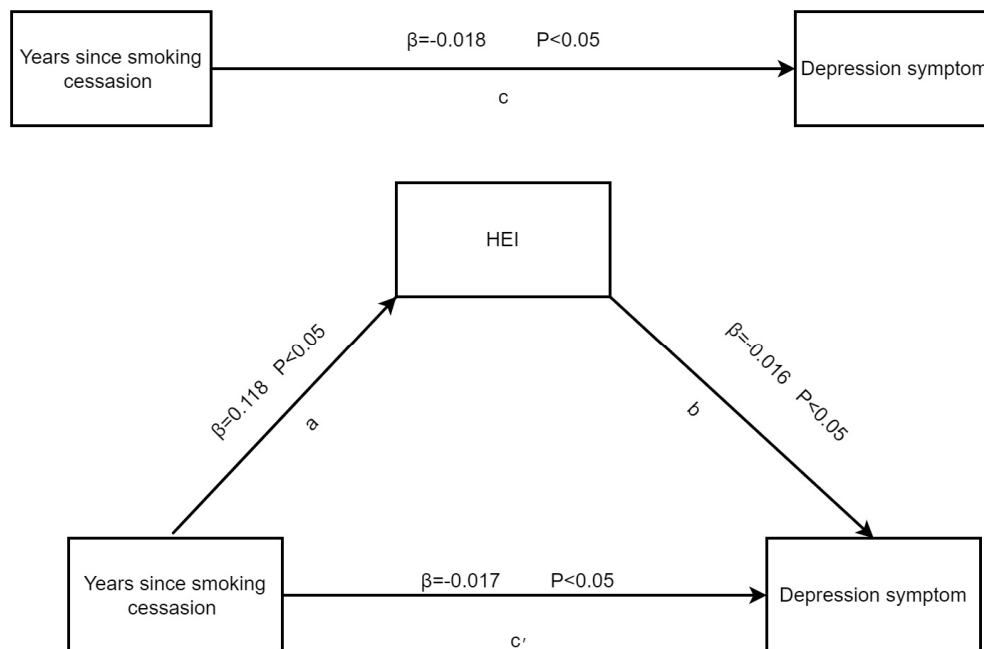

**Figure S1: Diet quality mediate the relationship between Smoking cessation and depressive symptoms**
